# Supplementary material for: The use of host cell DNA methylation analysis in the detection and management of women with advanced cervical intraepithelial neoplasia: a review
Source: PubMed Central journal article supplement (PMC7818489; doi:10.1111/1471-0528.16395), 2020-08-09
Supplement: BJO-128-504-s001.pdf [file BJO-128-504-s001.pdf]

**Table S1.** Overview of individual and combinations of host cell methylation markers included in commercial or research assays and their performance for the detection of CIN3 or worse in cervical scrapes or self-collected specimens in different clinical settings

| Marker (panel)                                                            | Assay | Reference | HPV    | Sample type                            | N    | CIN3 (%)    | ICC (%)    | Sens.             | Spec.             | NPV    | PPV    | Comment                                                                                    |
|---------------------------------------------------------------------------|-------|-----------|--------|----------------------------------------|------|-------------|------------|-------------------|-------------------|--------|--------|--------------------------------------------------------------------------------------------|
| <b>Screening populations</b>                                              |       |           |        |                                        |      |             |            |                   |                   |        |        |                                                                                            |
| FAM19A4                                                                   | QMSP  | [44]      | HPV+   | Cervical scrapes                       | 218  | 30 (13.8%)  | 3 (1.4%)   | 75.8              | 67                | 93.9   | 29.1   | Consecutive series from screening cohort                                                   |
| FAM19A4                                                                   | QMSP  | [62]      | HPV+   | Cervical scrapes                       | 115  | 42 (36.5%)  | 2 (1.7%)   | 68.18             | 60.6              | 75.4   | 51.7   | Endpoint CIN2+ (n=44); fixed number of women with normal cytology were included            |
| CADM1                                                                     | QMSP  | [62]      | HPV+   | Cervical scrapes                       | 115  | 42 (36.5%)  | 2 (1.7%)   | 70.5              | 60.6              | 76.8   | 52.5   | Endpoint CIN2+ (n=44); fixed number of women with normal cytology were included            |
| MAL                                                                       | QMSP  | [62]      | HPV+   | Cervical scrapes                       | 115  | 42 (36.5%)  | 2 (1.7%)   | 72.7              | 50.7              | 75     | 47.8   | Endpoint CIN2+ (n=44); fixed number of women with normal cytology were included            |
| <b>Non-attende population</b>                                             |       |           |        |                                        |      |             |            |                   |                   |        |        |                                                                                            |
| MAL/miR124-2                                                              | QMSP  | [31]      | HPV+   | Selfsamples                            | 355  | 65 (18.3%)  | 5 (1.4%)   | 64.9-71.6         | 70                | -      | -      |                                                                                            |
| MAL/miR124-2                                                              | QMSP  | [32]      | HPV+   | Cervical scrapes and selfsamples       | 1019 | 134 (13.2%) | 13 (1.3%)  | 68                | 55.3              | 91.1   | 20.4   | Pooled performance on both sample types (505 scrapes, 514 selfsamples)                     |
| EPB41L3                                                                   | QMSP  | [36]      | HPV+   | Cervical scrapes<br>Selfsamples (n=49) | 128  | 25 (19.5%)  | 9 (7.0%)   | 88<br>79          | 61<br>88          | -<br>- | -<br>- | Matching scrapes and selfsamples; fixed number of women with normal cytology were included |
| <b>Gynaecological referral populations/Selection of archived material</b> |       |           |        |                                        |      |             |            |                   |                   |        |        |                                                                                            |
| FAM19A4                                                                   | QMSP  | [61]      | HPV+   | Selfsamples                            | 450  | 73 (16.2%)  | 2 (0.4%)   | 65.3              | 81.3              | 92.1   | 41.2   | Gynaecological referral population                                                         |
| FAM19A4                                                                   | QMSP  | [60]      | HPV+   | Cervical scrapes                       | 508  | 87 (17.1%)  | 3 (0.6%)   | 75.6              | 71.1              | 93.1   | 36     | Gynaecological referral population                                                         |
| FAM19A4                                                                   | QMSP  | [29]      | HPV+   | Cervical scrapes                       | 215  | 57 (26.5%)  | 61 (28.4%) | 75.4              | 81.4              | -      | -      | Gynaecological referral population; endpoint HSIL+ (n=57)                                  |
| miR124-2                                                                  | QMSP  | [63]      | HPV+/- | Cervical scrapes                       | 407  | 128 (31.4%) | -          | 86.7              | 61.3              | -      | -      | Colposcopy referral population; endpoint CIN2+ (n=128)                                     |
| MAL                                                                       | PSQ   | [65]      | HPV+   | Cervical scrapes                       | 884  | 208 (23.5%) | 9 (1.1%)   | 94                | 6                 | -      | -      | Women with abnormal cytology referred for colposcopy; endpoint CIN2/3 (n=330)              |
| EPB41L3/HPV16L1/HPV16L2/HPV18L2/HPV31L1 <sup>a</sup>                      | PSQ   | [69]      | HPV+   | Cervical scrapes                       | 1493 | 373 (25%)   | -          | 90                | 36                | -      | -      | Women with abnormal cytology referred for colposcopy; endpoint CIN2/3 (n=556)              |
| EPB41L3                                                                   | QMSP  | [63]      | HPV+/- | Cervical scrapes                       | 407  | 128 (31.4%) | -          | 63.3 <sup>b</sup> | 84.2 <sup>b</sup> | -      | -      | Colposcopy referral population; endpoint CIN2+                                             |
| EPB41L3                                                                   | QMSP  | [35]      | HPV+   | Cervical scrapes                       | 152  | 59 (38.8%)  | 43 (28.3%) | 85                | 68                | -      | -      | Gynaecological referral population                                                         |
| EPB41L3                                                                   | QMSP  | [68]      | HPV+/- | Cervical scrapes                       | 143  | 37 (25.9%)  | 2 (1.4%)   | 67 <sup>b</sup>   | 85 <sup>b</sup>   | -      | -      | Women with abnormal cytology                                                               |
| EPB41L3                                                                   | PSQ   | [65]      | HPV+   | Cervical scrapes                       | 884  | 208 (23.5%) | 9 (1.1%)   | 85                | 31                | -      | -      | Women with abnormal cytology referred for colposcopy; endpoint CIN2/3 (n=330)              |
| DLX1/ITG4/RXFP3/SOX17/ZNF671                                              | QMSP  | [38]      | HPV+   | Cervical scrapes                       | 217  | 25 (11.5%)  | 19 (8.8%)  | 76.2              | 82.9              | -      | -      | Colposcopy referral population                                                             |
| PAX1                                                                      | PSQ   | [46]      | HPV+/- | Cervical scrapes                       | 121  | 20 (16.5%)  | 27 (22.3%) | 44.1 <sup>b</sup> | 95 <sup>b</sup>   | -      | -      | Endpoint CIN2/3 (n=34)                                                                     |

a Combination of cellular and viral targets

b Performance evaluated independent of HPV result

Abbreviations: CIN, cervical intraepithelial neoplasia, graded 1–3; HPV, human papillomavirus; HSIL, high-grade squamous intraepithelial lesion; ICC, invasive cervical cancer; N, sample size; NPV, negative predictive value; PPV positive predictive value; PSQ, pyrosequencing; QMSP; quantitative methylation-specific polymerase chain reaction; Sens., sensitivity; Spec., specificity.
